# Supplementary material for: Cancer cell membrane-modified biodegradable mesoporous silica nanocarriers for berberine therapy of liver cancer
Source: Royal Society of Chemistry journal article supplement (doi:10.1039/c8ra07574c), 2018-01-01
Supplement: c8ra07574c1.pdf [file c8ra07574c1.pdf]

## Supplementary Information

### Cancer Cell Membrane-Modified biodegrade mesoporous silica nanocarriers for Berberine therapy of liver cancer

Juan Yue<sup>a</sup>, Zheng Wang<sup>\*b</sup>, Dan Shao<sup>b</sup>, Zhimin Chang<sup>b</sup>, Rui Hu<sup>c</sup>, Li Li<sup>b</sup>, Shi-zhong Luo<sup>\*a</sup>, and Wen-fei Dong<sup>\*b</sup>

<sup>a</sup> College of Chemistry and Materials Science, The Key Laboratory of Functional Molecular Solids, Ministry of Education, Anhui Laboratory of Molecular-Based Materials, Center for Nano Science and Technology, Anhui Normal University. No.1, Beijing East Road, Wuhu 241000, PR China

<sup>b</sup> CAS Key Laboratory of Bio-Medical Diagnostics, Suzhou Institute of Biomedical Engineering and Technology, Chinese Academy of Sciences, Suzhou 215163, China

<sup>c</sup> Department of Radiation Oncology, Affiliated Suzhou Hospital of Nanjing Medical University,

\*Corresponding Authors: Wangz@sibet.ac.cn, shzhluo@ahnu.edu.cn, Wenfeidong@sibet.ac.cn

#### Materials

Tetraethoxysilane (TEOS), Cetyltrimethylammonium bromide (CTAB), Bis[3-(triethoxysilyl)propyl]tetrasulfide (BTES), 3-aminopropyltriethoxysilane (APS) and berberine hydrochloride were obtained from Sigma-Aldrich (St Louis, MO, USA). Hydrochloric acid (HCL), anhydrous ethanol, butanedioic acid (SAA), triethanolamine (TEA) and N, N-dimethylformamide (DMF) were purchased from Sinopharm Chemical Reagent Company (Beijing, China). Fluorescein isothiocyanate (FITC) was purchased from Shanghai Hualan Chemical Co. (Shanghai, China). DMEM medium and foetal bovine serum (FBS) were purchased from HyClone (USA). Glutathione (GSH) and 5-diphenyltetrazoliummerma bromide (MTT) assay kits were purchased from Energy Chemical (Shanghai, China), H&E was purchased from Roche (Switzerland).

Cell Culture: HepG2 cell line and HL-7702 cell line were obtained from cell

bank of Shanghai, CAS (Shanghai, China) and were grown in RPMI 1640 (Gibico, USA) with 10% FBS, 100 U mL<sup>-1</sup> penicillin G sodium, 100 µg mL<sup>-1</sup> streptomycin sulfate, 2.5 g L<sup>-1</sup> glucose, and 0.11 g L<sup>-1</sup> sodium pyruvate. The cells were incubated at 37°C in a humidified incubator with 5% CO<sub>2</sub>.

Animals: Female BALB/c Nude mice (4-5 weeks old, 18-22 g) were purchased from Shanghai Experimental Animal Center (Shanghai). All the animal procedures were carried out under the guideline approved by the Institutional Animal Care and Use Committee (IACUC) of the Shanghai Institute of Materia Medica, CAS.

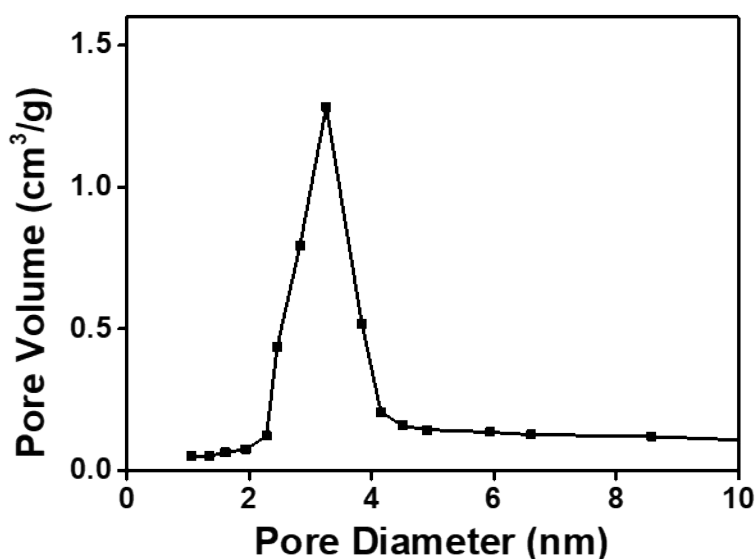

FigS1A. The porous diameter distribution of *ss*-MONs.

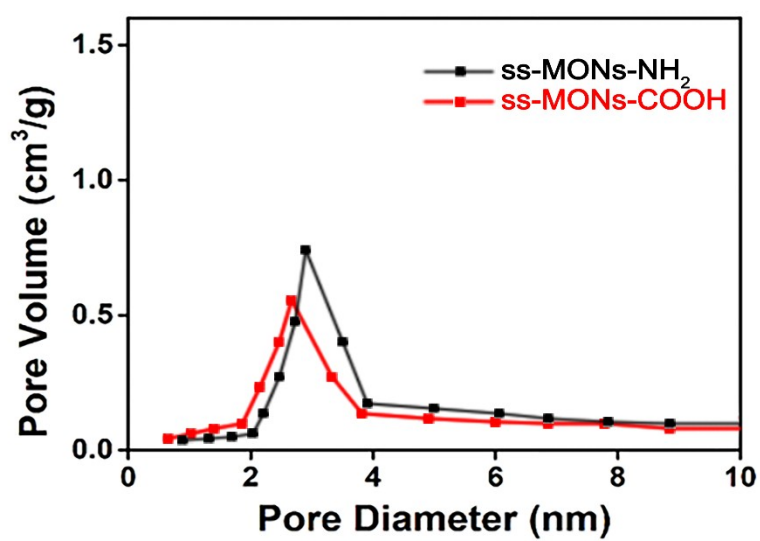

FigS1B. The porous diameter distribution of *ss*-MONs-NH<sub>2</sub> and *ss*-MONs-COOH.

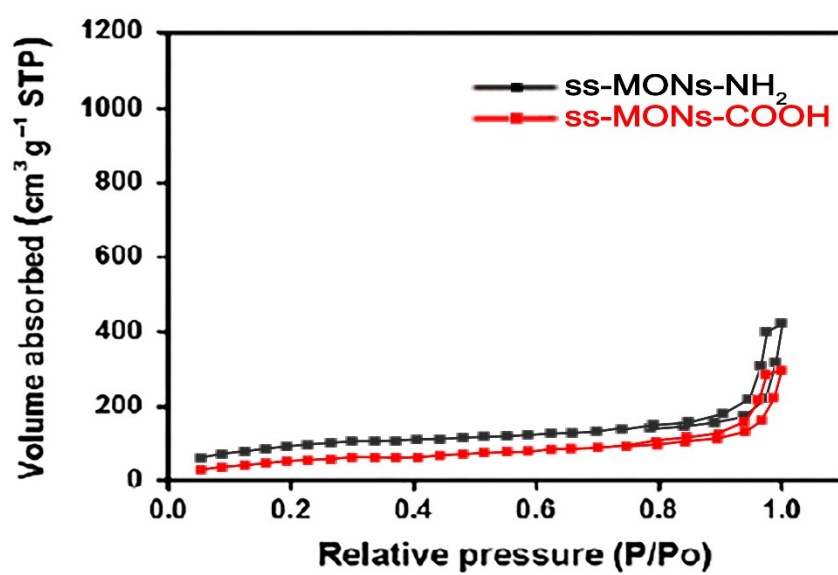

FigS1C. N<sub>2</sub> sorption isotherms and porous size distribution of *ss*-MONs-NH<sub>2</sub> and *ss*-MONs-COOH.

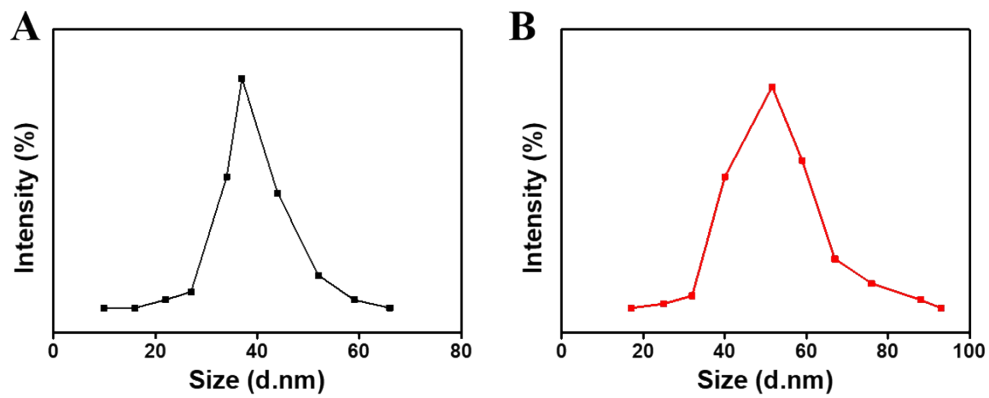

FigS2. The size distribution of ss-MONs (A) and CM-ss-MONs (B)

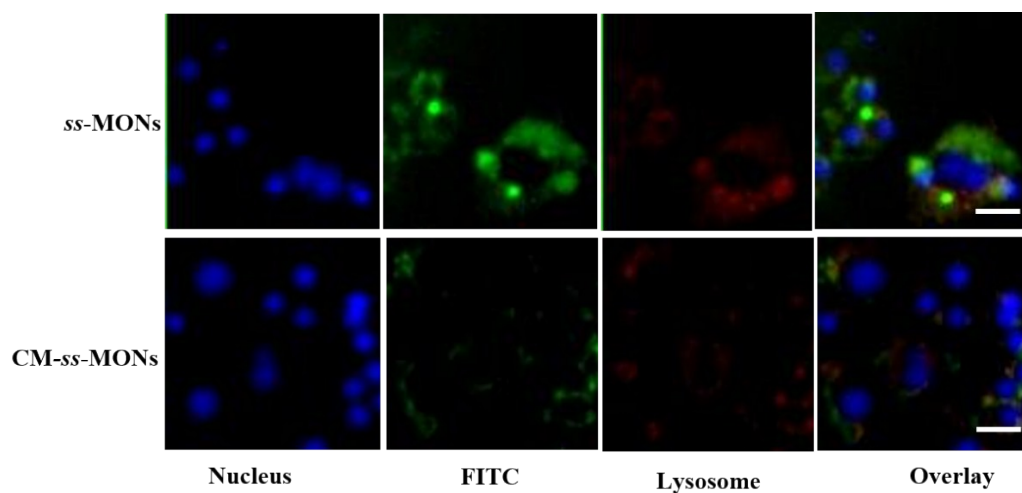

Fig S3. CLSM images of RAW264.7 cells after treated with FITC- labeled ss-MONs or FITC- labeled CM-ss-MONs for 3 h
